# Supplementary material for: miR-146a deficiency does not aggravate muscular dystrophy in mdx mice
Source: PubMed Central journal article supplement (PMC6693262; doi:10.1186/s13395-019-0207-0), 2019-08-14

# Additional file 1: Figure S1

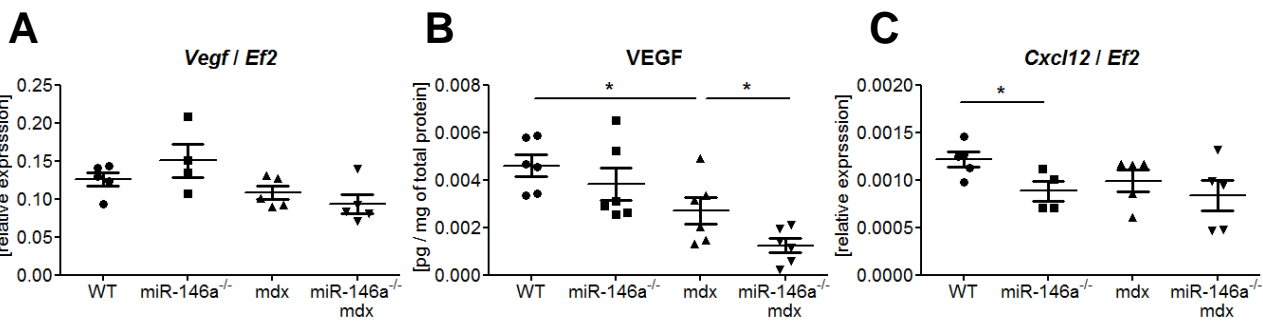

Supplement: 13395_2019_207_MOESM1_ESM.pdf [file 13395_2019_207_MOESM1_ESM.pdf]
